# Supplementary material for: The fabrication and molecular alignment of poly(ethylene oxide) grating film based on hot embossing technology
Source: Royal Society of Chemistry journal article supplement (doi:10.1039/c9nj03753e), 2019-01-01
Supplement: c9nj03753e1.pdf [file c9nj03753e1.pdf]

**Electronic Supplementary Information (ESI) for New Journal of  
Chemistry**

The fabrication and molecular alignment of poly(ethylene oxide) grating  
film based on hot embossing technology

Zhanhua Song <sup>a,b</sup>, Menxiang Qian <sup>a,b</sup>, Hangyu Zhang <sup>a,b</sup>, Tao Wang <sup>a,b</sup>, Guangzhu Ding<sup>a,b,\*</sup> and  
Jieping Liu <sup>a,b,\*</sup>

<sup>a</sup>College of Chemistry and Materials Science, Huaibei Normal University, Huaibei 235000,  
China

<sup>b</sup>Anhui Key Laboratory of Energetic Materials, Anhui, 235000, China

\* Corresponding Author E-mail address: dinggz@chnu.edu.cn; jpliu@chnu.edu.cn

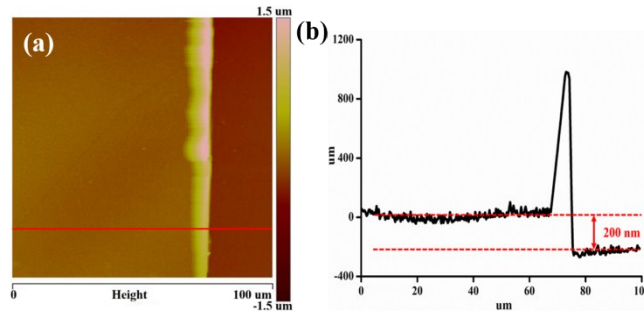

**Fig. S1** The AFM height image of pristine PEO film for the thickness measurement (a) and cross-sectional profile of AFM height image (b).

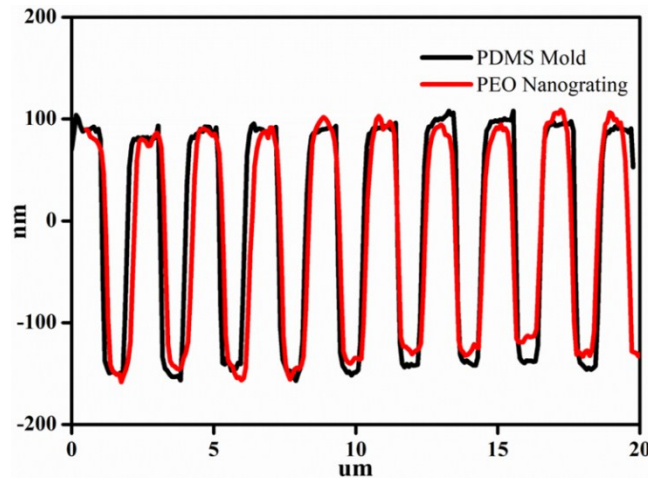

**Fig. S2** The cross-sectional profiles of AFM height images for PDMS template and the fabricated PEO grating structure. PEO film is first heating to a temperature above 80 °C to eliminate the thermal history and next is transferred to 30 °C at once to carry out the hot embossing process.

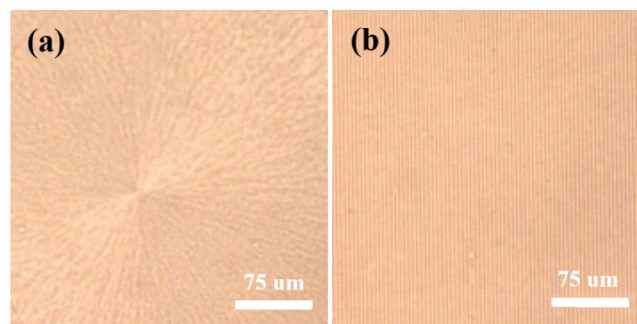

**Fig. S3** Polarized optical microscopy (POM) images of PEO polymer film: (a) pristine film and (b) PEO grating film.

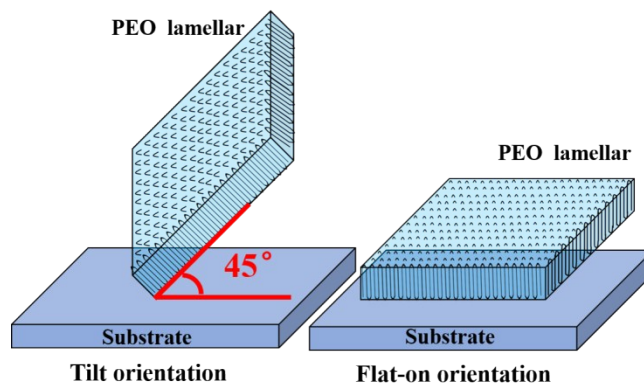

**Fig. S4** Schematic indication of tilt and flat-on orientation of PEO lamellar orientation.

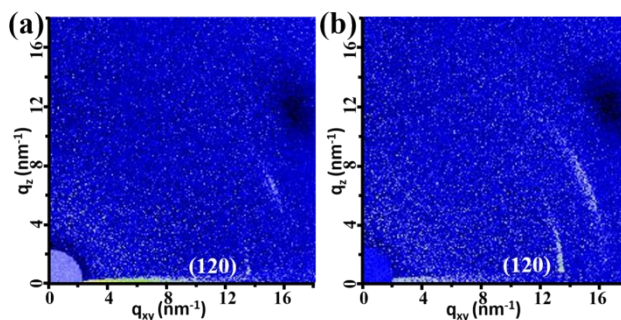

**Fig. S5** The 2D GIWAXD patterns of thermal treatment PEO film with various thickness for: (a) 30 nm and (b) 200 nm. The thermal treatment is performed by the same conditions as the fabrication of PEO grating film but with an unpatterned PDMS film rather than patterned PDMS film as template.

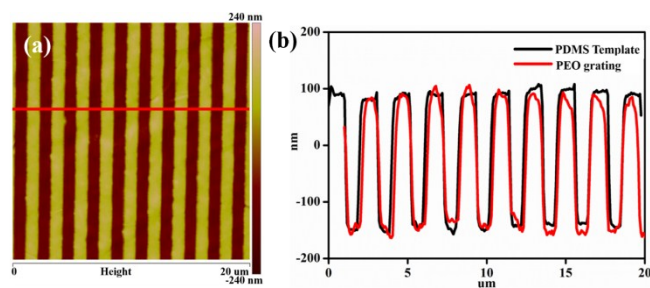

**Fig. S6** The AFM height pattern of PEO grating film (a) and cross-sectional profile of AFM height images for PDMS template and the fabricated PEO grating structure (b). PEO film is first heating to a temperature above 80 °C to eliminate the thermal history and next is transferred to 35 °C at once to carry out the hot embossing process.
